# Supplementary material for: Whole Genome Sequencing Allows Better Understanding of the Evolutionary History of Leptospira interrogans Serovar Hardjo
Source: PubMed Central journal article supplement (PMC4956267; doi:10.1371/journal.pone.0159387), 2016-07-21
Supplement: pone.0159387.s001.pdf [file pone.0159387.s001.pdf]

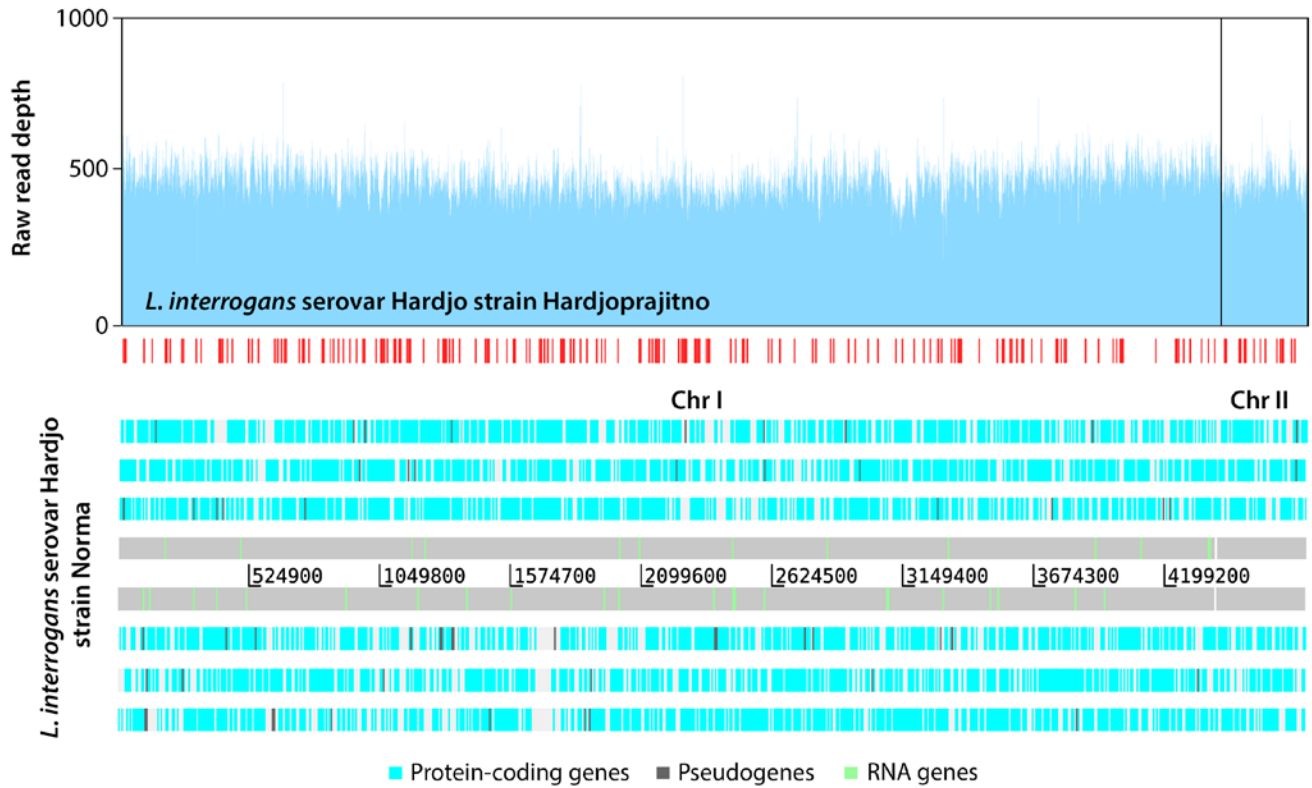

**Figure S1. Mapping of the reads from *L. interrogans* serovar Hardjo strain Hardjoprajitno to the genome of *L. interrogans* serovar Hardjo strain Norma.** Raw read depth plotted in light blue was averaged over a window of 500 bp. Vertical red bars below the coverage plot indicate SNPs located within predicted protein-coding genes.
