# Supplementary material for: Whole Genome Sequencing Allows Better Understanding of the Evolutionary History of Leptospira interrogans Serovar Hardjo
Source: PubMed Central journal article supplement (PMC4956267; doi:10.1371/journal.pone.0159387), 2016-07-21
Supplement: pone.0159387.s002.pdf [file pone.0159387.s002.pdf]

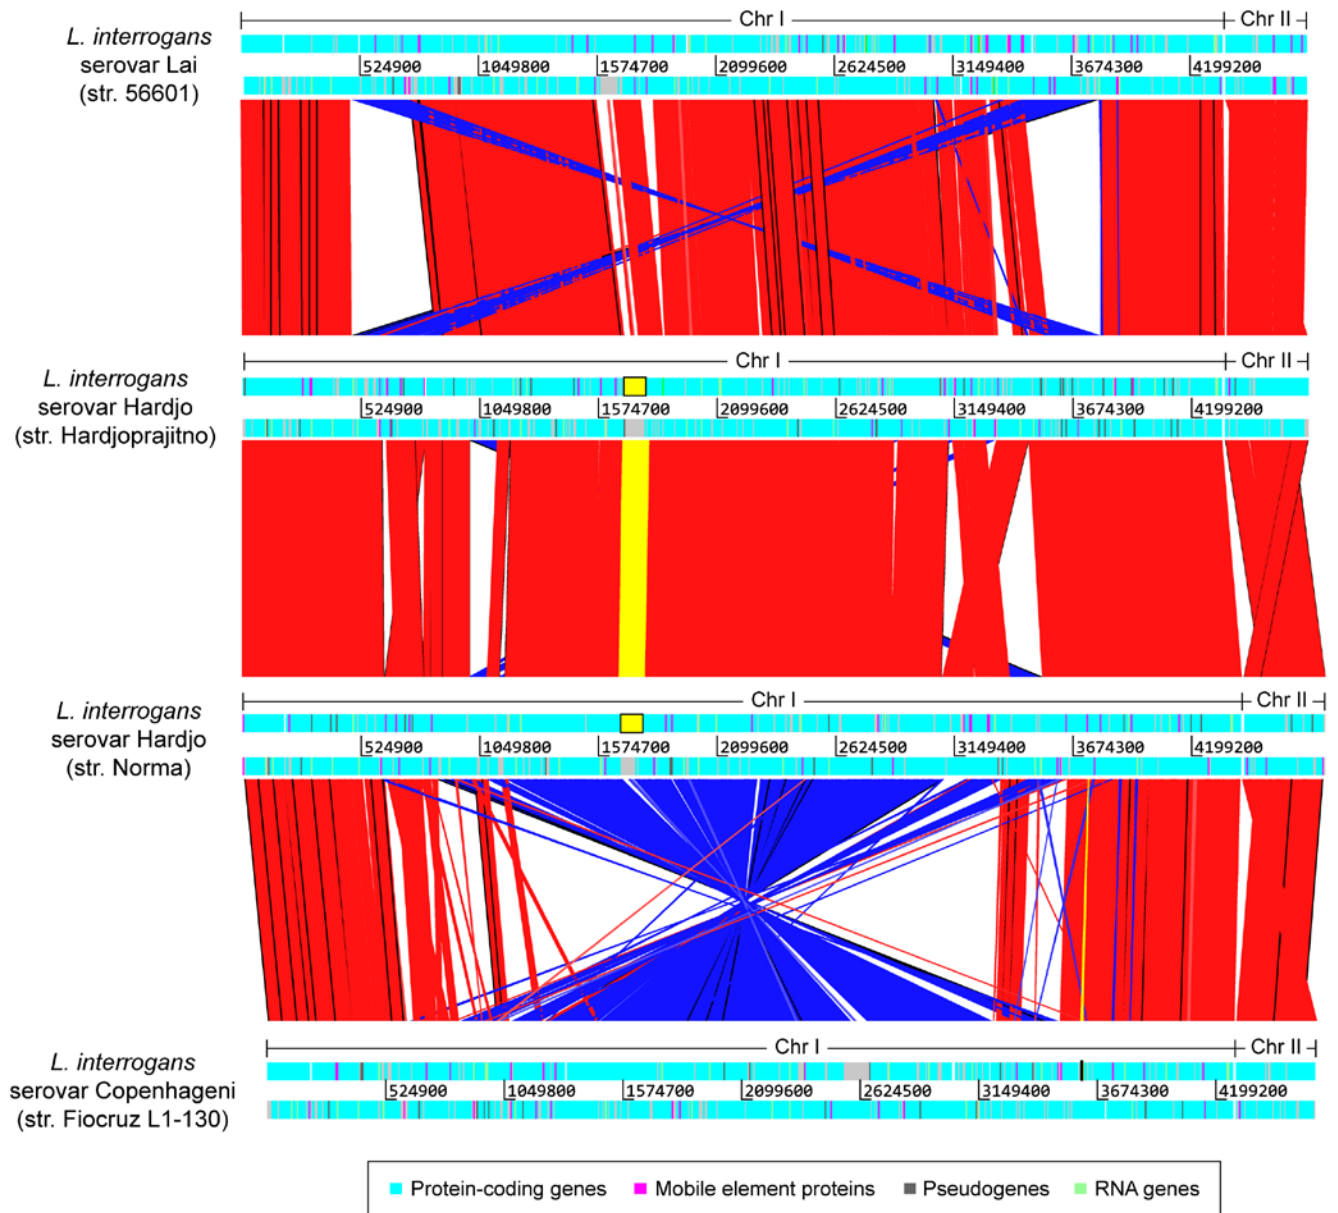

**Figure S2. Comparison of the two *L. interrogans* serovar Hardjo genomes included in this study with those of serovars Lai and Copenhageni.** Red bands indicate similar regions and blue bands indicate inversions. Sequences corresponding to the *rfb* loci typical of the Hardjo serovar are highlighted in yellow.
