# Supplementary material for: Whole Genome Sequencing Allows Better Understanding of the Evolutionary History of Leptospira interrogans Serovar Hardjo
Source: PubMed Central journal article supplement (PMC4956267; doi:10.1371/journal.pone.0159387), 2016-07-21
Supplement: pone.0159387.s003.pdf [file pone.0159387.s003.pdf]

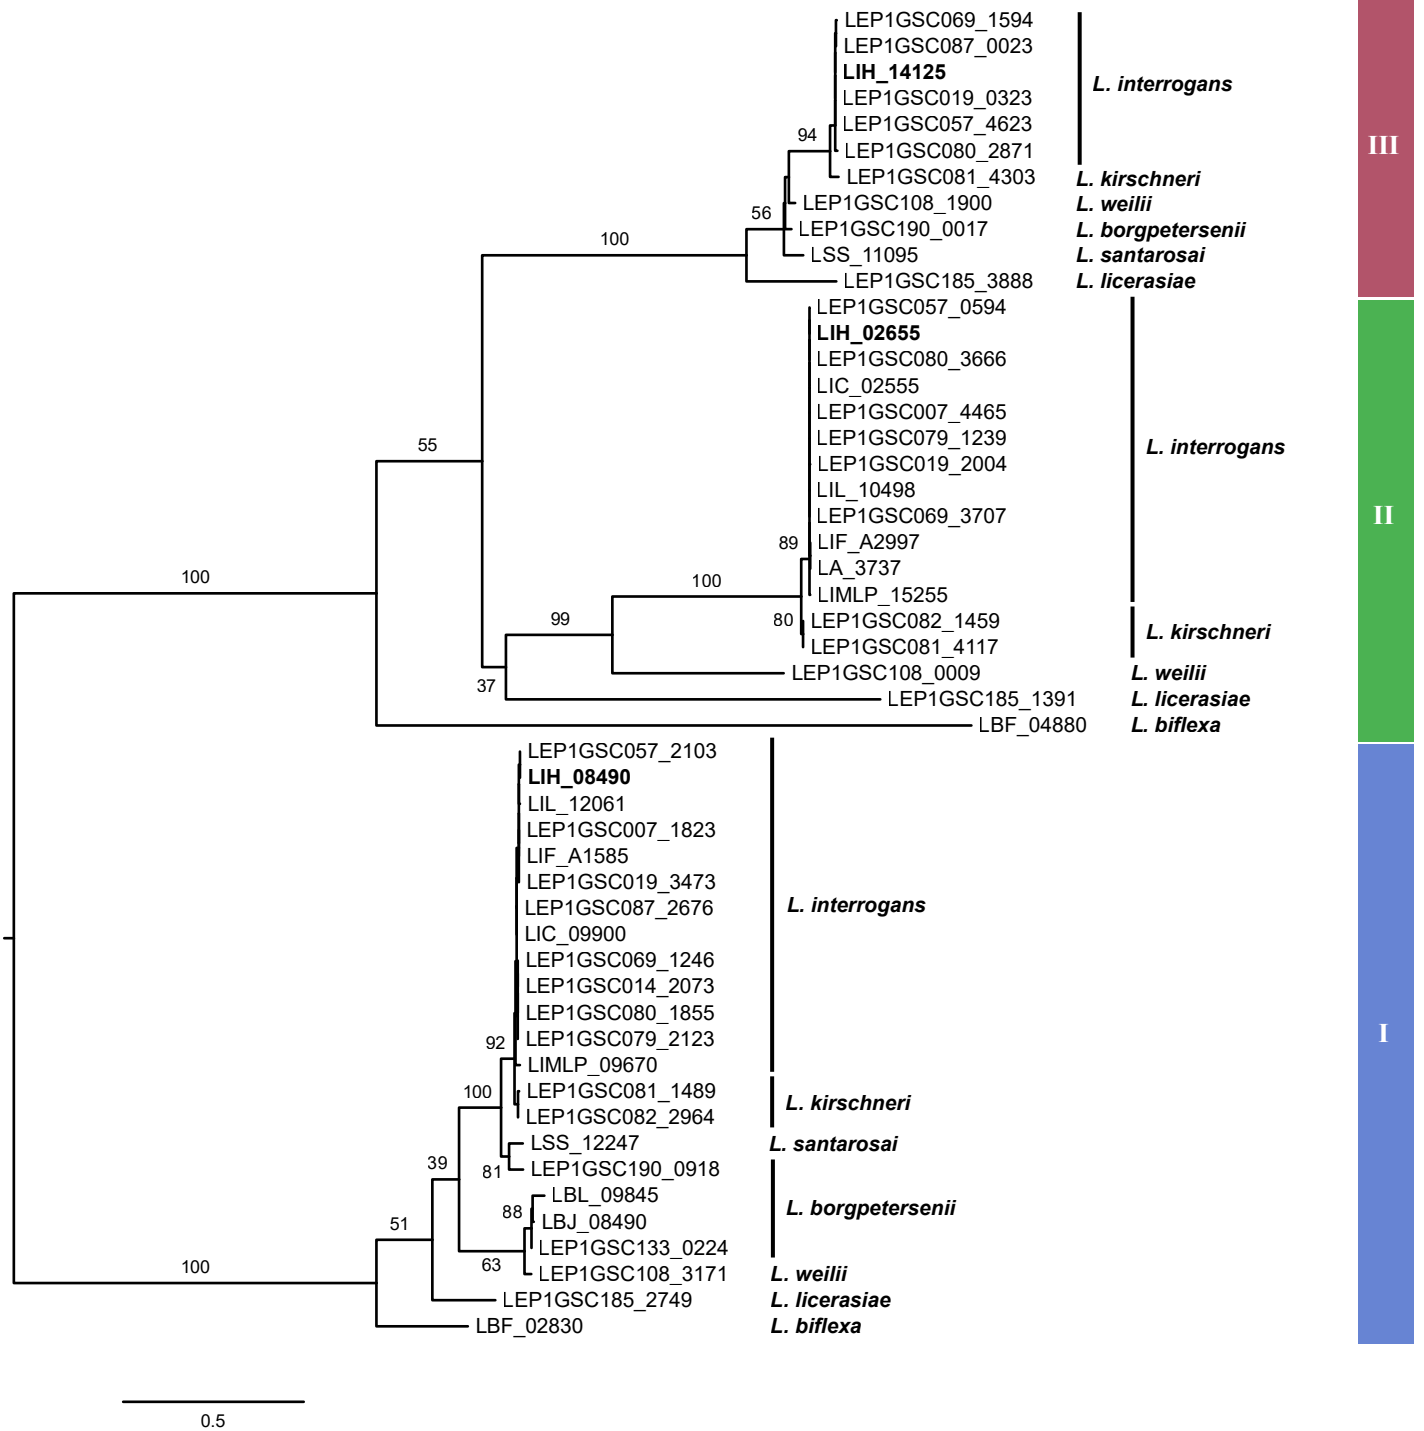

**Figure S3. Maximum likelihood tree of *acrA* genes.** This tree was built with the amino acid sequences of the *acrA* genes from the RND transporter gene clusters present in the *Leptospira* genomes used in this study. The tree was built with PhyML 3.0 using the LG model and 500 bootstrap replicates. Bootstrap values are indicated for branches clustering the genes from different species. Genes from the strain sequenced in this study are indicated in bold.
